# Supplementary material for: Facile synthesis of monodisperse SrAl2O4:Eu2+ cage-like microspheres with an excellent luminescence quantum yield
Source: Royal Society of Chemistry journal article supplement (doi:10.1039/c7tc05203k), 2018-01-01
Supplement: c7tc05203k1.pdf [file c7tc05203k1.pdf]

## Electronic Supplementary Information (ESI)

### Facile synthesis of monodisperse $\text{SrAl}_2\text{O}_4:\text{Eu}^{2+}$ cage-like microspheres with excellent luminescence quantum yield

Jun Wan, Yuting Zhang, Yuan Wang, Ronghua Ma, Yimin Wu, Xvsheng Qiao\*, and  
Xianping Fan\*

\*Corresponding authors: fanxp@zju.edu.cn (Xianping Fan), qiaoxus@zju.edu.cn (Xvsheng Qiao)

**Characterization:** The contents of real doped  $\text{Eu}^{2+}$  in the final product are characterized by Inductively Coupled Plasma Optical Emission Spectrometry (ICP-OES, PerkinElmer, Optima 7000 DV, America).

**Table S1** Nominal and measured concentration of  $\text{Eu}^{2+}$  in  $\text{SrAl}_2\text{O}_4$  microspheres.

| Nominal $\text{Eu}^{2+}$ concentration<br>(in mol %) | Measured $\text{Eu}^{2+}$ concentration<br>(in mol %) |
|------------------------------------------------------|-------------------------------------------------------|
| 0.5                                                  | 0.14                                                  |
| 1                                                    | 0.31                                                  |
| 5                                                    | 1.67                                                  |
| 10                                                   | 3.17                                                  |
| 15                                                   | 5.03                                                  |

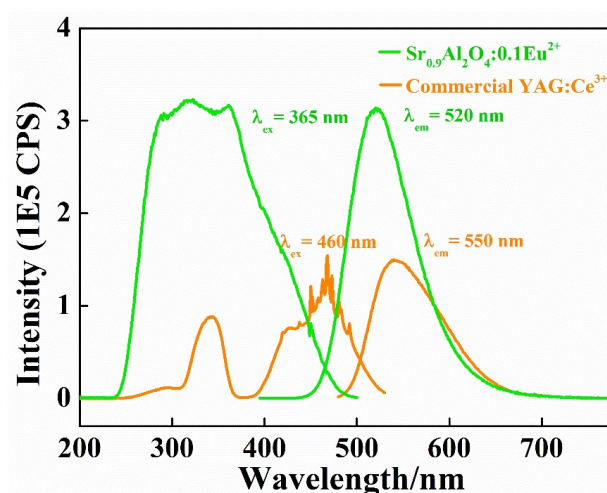

**Fig.S1** Excitation and emission spectra of  $\text{Sr}_{0.9}\text{Al}_2\text{O}_4:0.1\text{Eu}^{2+}$  cage-like microspheres and commercial  $\text{YAG}:\text{Ce}^{3+}$  phosphors.

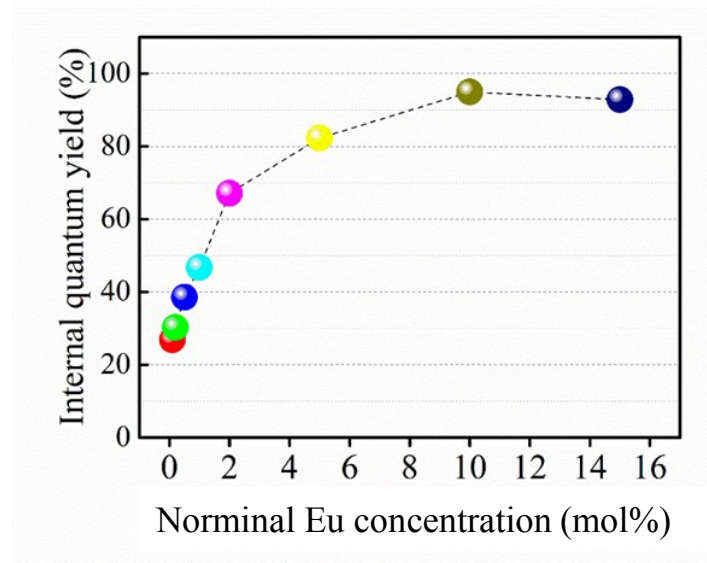

**Fig.S2** Quantum yields (QY) of  $\text{Sr}_{1-x}\text{Al}_2\text{O}_4:\text{xEu}^{2+}$  cage-like microspheres with different nominal  $\text{Eu}^{2+}$  concentration.

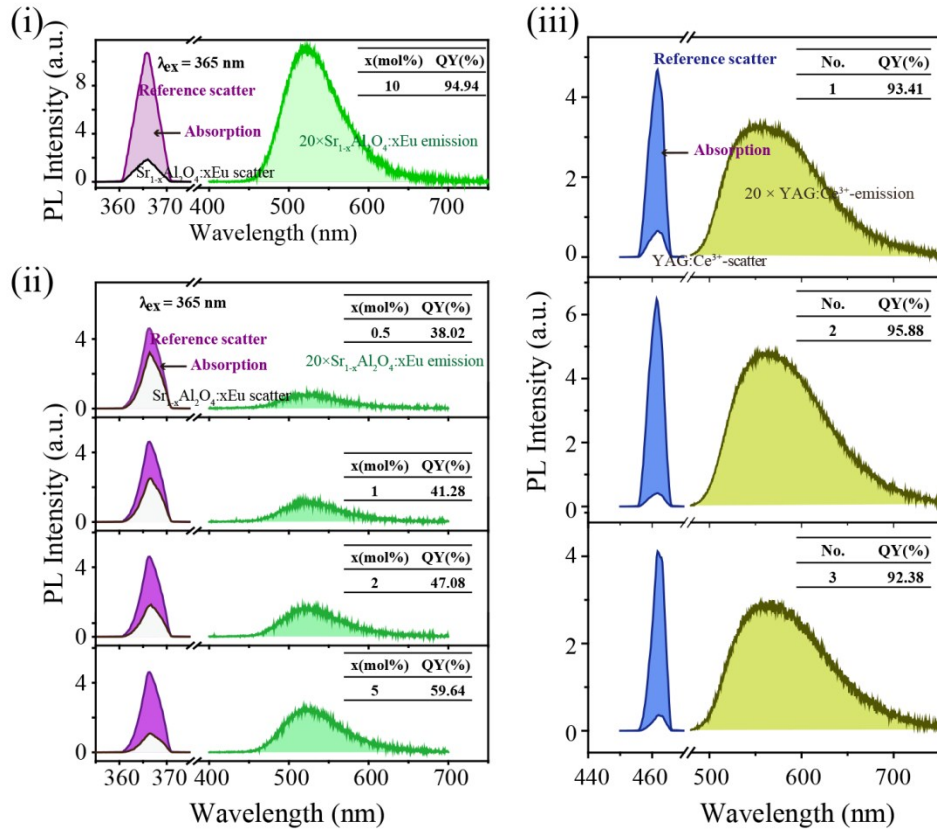

**Fig.S3** Quantum yields of  $\text{Sr}_{1-x}\text{Al}_2\text{O}_4:\text{xEu}^{2+}$  cage-like microspheres with different  $\text{Eu}^{2+}$  doped concentration and commercial YAG:Ce<sup>3+</sup> phosphors.
